# Supplementary material
Source: Springer Nature journal article supplement (https://www.springermedizin.de/resource/supplementary/12865_2013_580_MOESM11_ESM.pdf/9428280)
Supplement: MOESM11 [file 9428280]

# Forced Swim Test

Float Time (s)

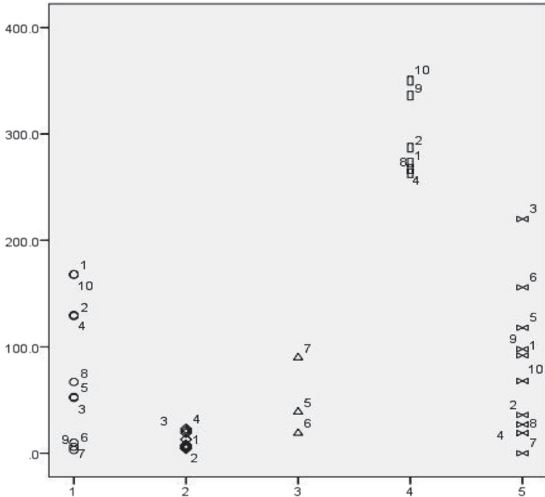

Groups

FST Groups

- 1 - 1.5 M MRL/pr
- ◇ 2 - 1.5 M MRL/mp
- △ 3 - 4 M MRL/pr with Low Float Time
- 4 - 4 M MRL/pr with High Float Time
- ▽ 5 - 4 M MRL/mp
